# Supplementary material for: Antifreezing ionotronic skin based on flexible, transparent, and tunable ionic conductive nanocellulose hydrogels
Source: Research Square preprint supplement (doi:10.21203/rs.3.rs-301919/v1), 2021-03-15
Supplement: Supplementary file 1 [file 33dd06f3c75a90787c3d6a8a.docx]

**Supporting Information**

**Antifreezing ionotronic skin based on flexible, transparent, and tunable ionic conductive nanocellulose hydrogels**

Enwen Zhua,b, Haiyu Xub, Yuanyuan Xieb, Yiheng Songb, Dongning Liub, Yujiao Gaob, Zhuqun Shia,b*, Quanling Yangb*, Chuanxi Xiongb

a School of Chemistry, Chemical Engineering and Life Sciences, Wuhan University of Technology, Wuhan 430070, China

b School of Materials Science and Engineering, Wuhan University of Technology, Wuhan 430070, China

*Corresponding author. E-mail: zqshi2016@whut.edu.cn (Z. Shi), [yangql@whut.edu.c](mailto:yangql@whut.edu.c) n (Q. Yang)

**Table S1.** Mechanical properties of the hydrogels of H+-TOCN, 4Li+-TOCN, 4Ca2+-TOCN, 4K+-TOCN.


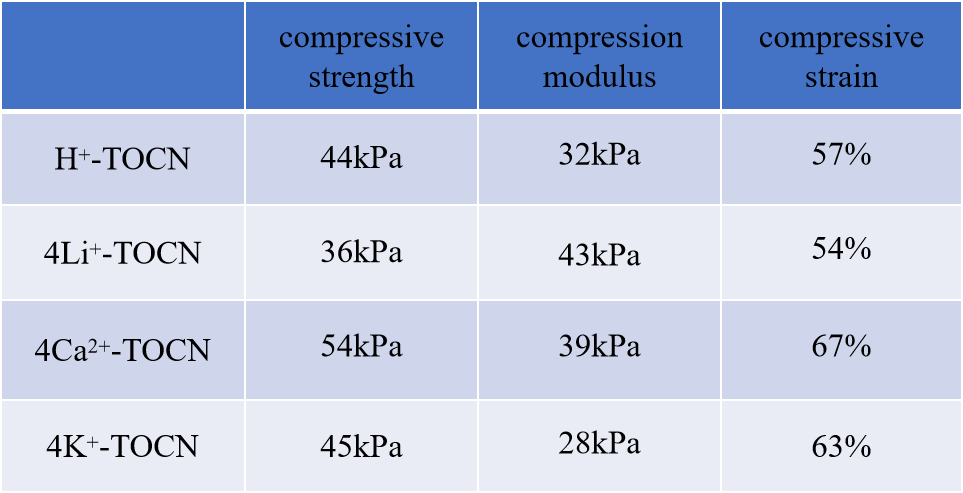


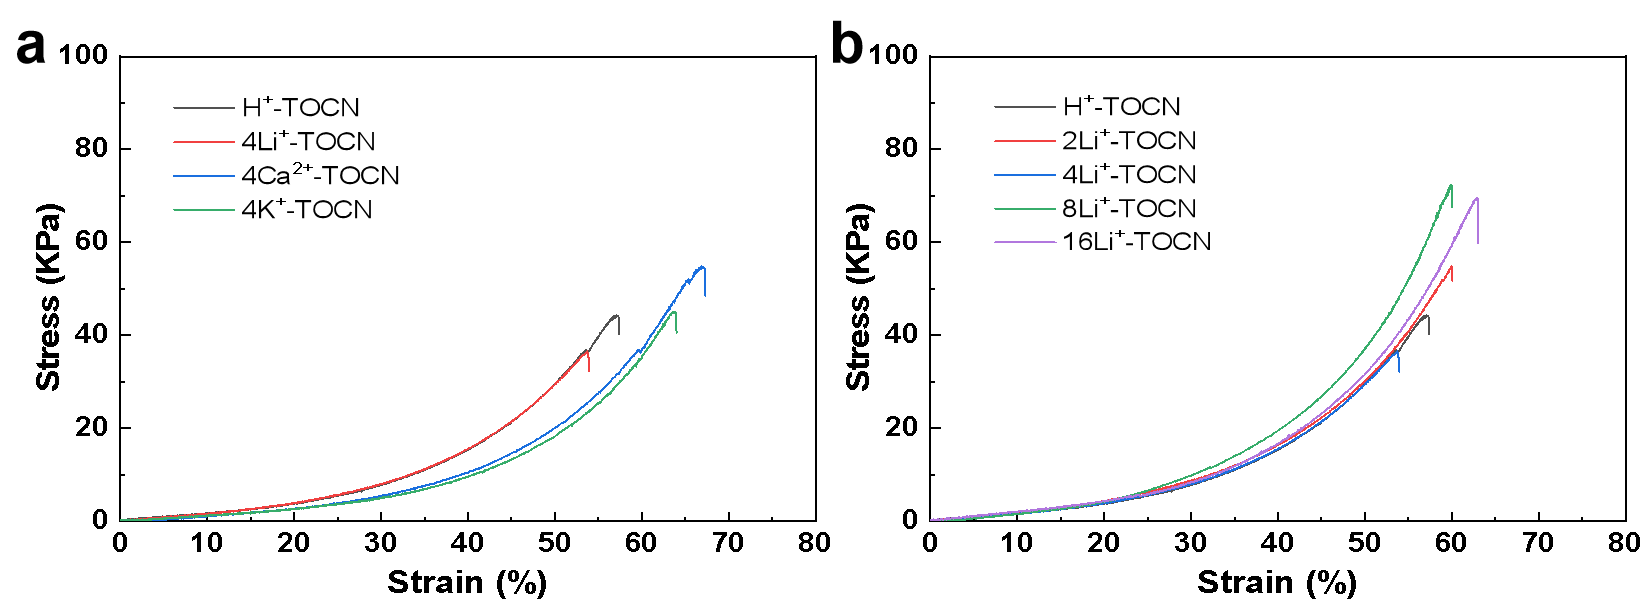


**Fig. S1.** Compressive stress-strain curves of (a) H+-TOCN, 4Li+-TOCN, 4Ca2+-TOCN, and 4K+-TOCN hydrogels; (b) Li+-TOCN hydrogels with different Li+ concentrations.

**
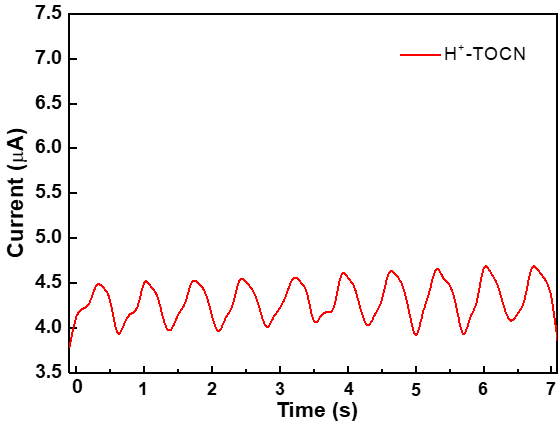
**

**Fig. S2.** Sensing properties of H+-TOCN hydrogel.
